# Supplementary material
Source: HighWire-hosted journal article supplement (https://www.rcpjournals.org/highwire/filestream/8497/field_highwire_adjunct_files/1/Shah_supp_file_2.pdf)

Average waiting time from referral to 1st face to face appointment (10/13 teams) - X-bar Chart

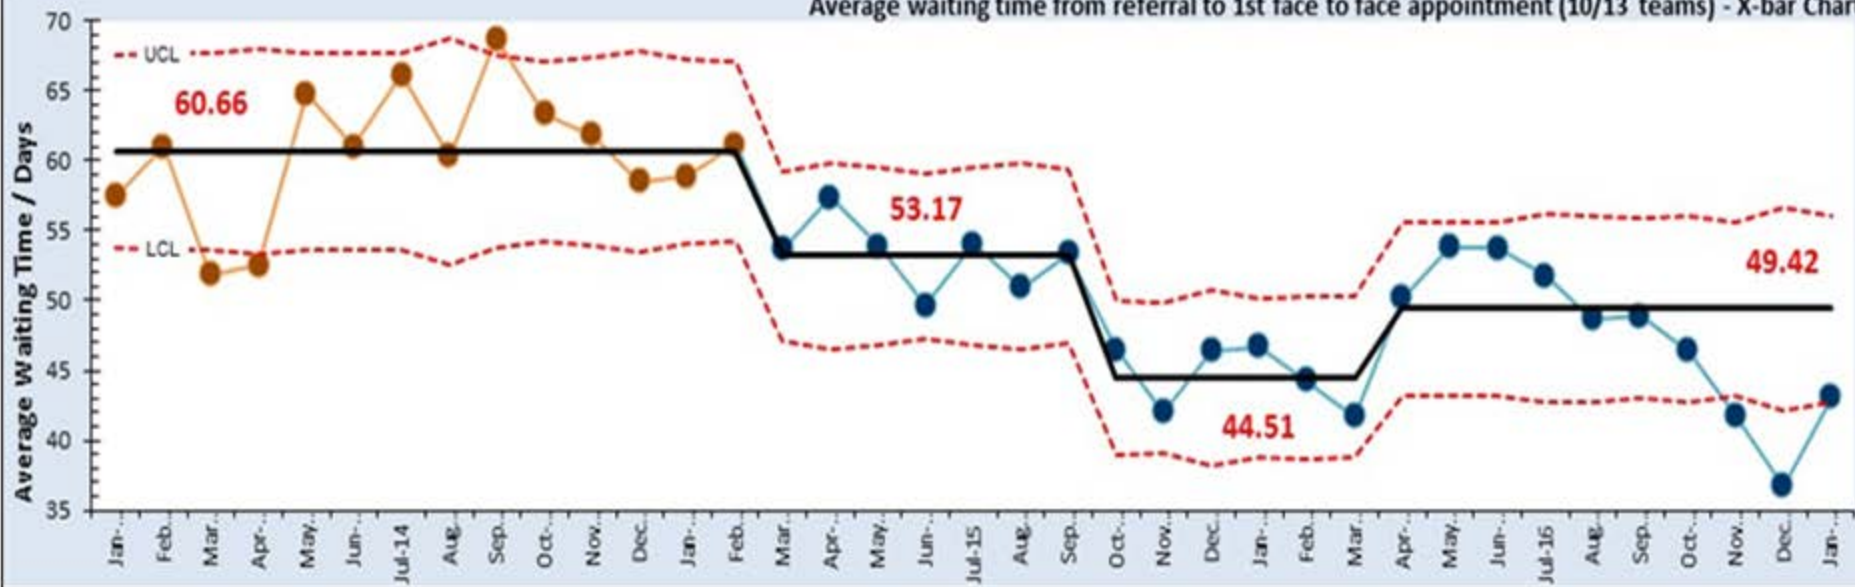

No. of referrals received (10/13 teams) - I Chart

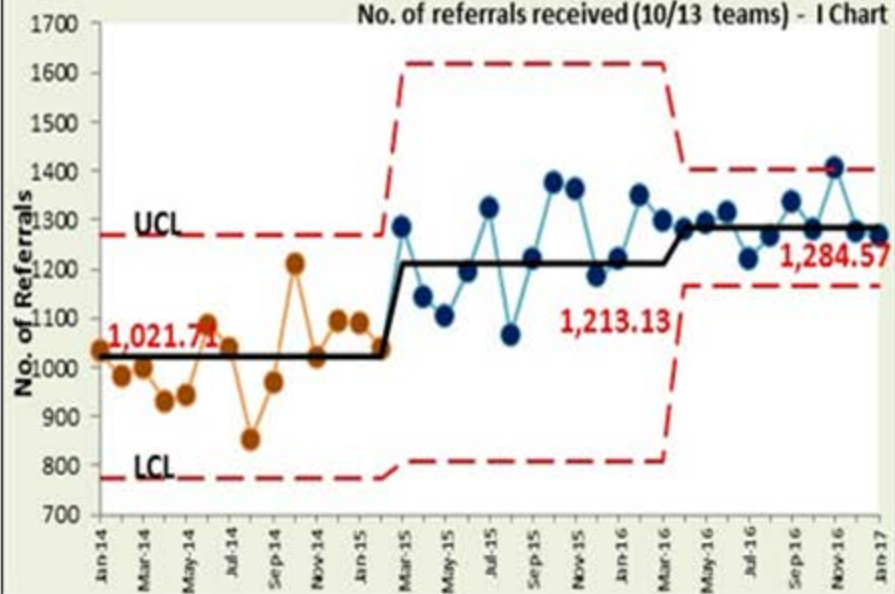

1st face to face appointments non-attendance (10/13 teams) - P Chart

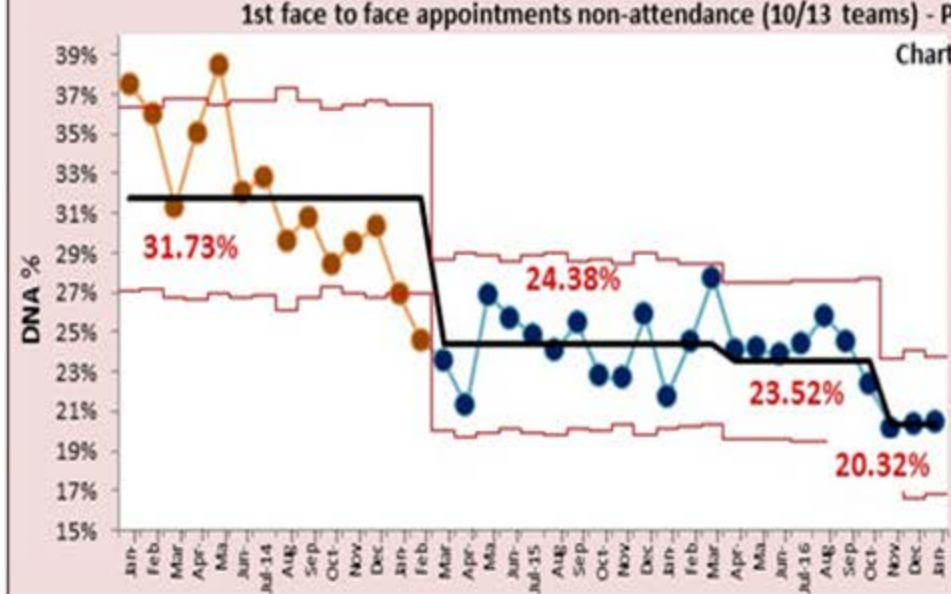

Supplement: Shah_supp_file_2.pdf [file Shah_supp_file_2.pdf]
